# Supplementary material
Source: PubMed Central journal article supplement (PMC2781449)
Supplement: supp_M109.018945_jbc.M109.018945-1.pdf [file supp_M109.018945_jbc.M109.018945-1.pdf]

Supplemental data for the manuscript by Haerteis et al.:

**‘The  $\delta$ -subunit of the epithelial sodium channel (ENaC) enhances channel activity and alters proteolytic ENaC activation’**

**Generation and validation of rabbit anti-human  $\beta$ - and  $\gamma$ -ENaC antibodies**

Subunit specific antibodies against human  $\beta$ - and  $\gamma$ -ENaC were obtained by immunizing rabbits (Pineda Antibody Service, Berlin, Germany) with keyhole limpet hemocyanin-coupled synthetic peptides. The immunizing peptides corresponded to the human peptide sequences homologous to the rat peptide sequences previously used to generate subunit specific antibodies against rat ENaC (Masilamani 1999, *J Clin Invest* **104**, 19-23). Peptides were synthesized corresponding to the amino acid sequence 619-640 of  $\beta$ -hENaC (NH<sub>2</sub>-NYDSLRLQPLDVIESDSEGDAI-COOH) and to the amino acid sequence 628-649 of  $\gamma$ -hENaC (NH<sub>2</sub>-NTLRLERAFSNQLTDTQMLDEL-COOH). The specificity of the affinity-purified antibodies for the  $\beta$ - and  $\gamma$ -subunits of hENaC was tested using the oocyte expression system and western blot analysis as illustrated in the figure below.

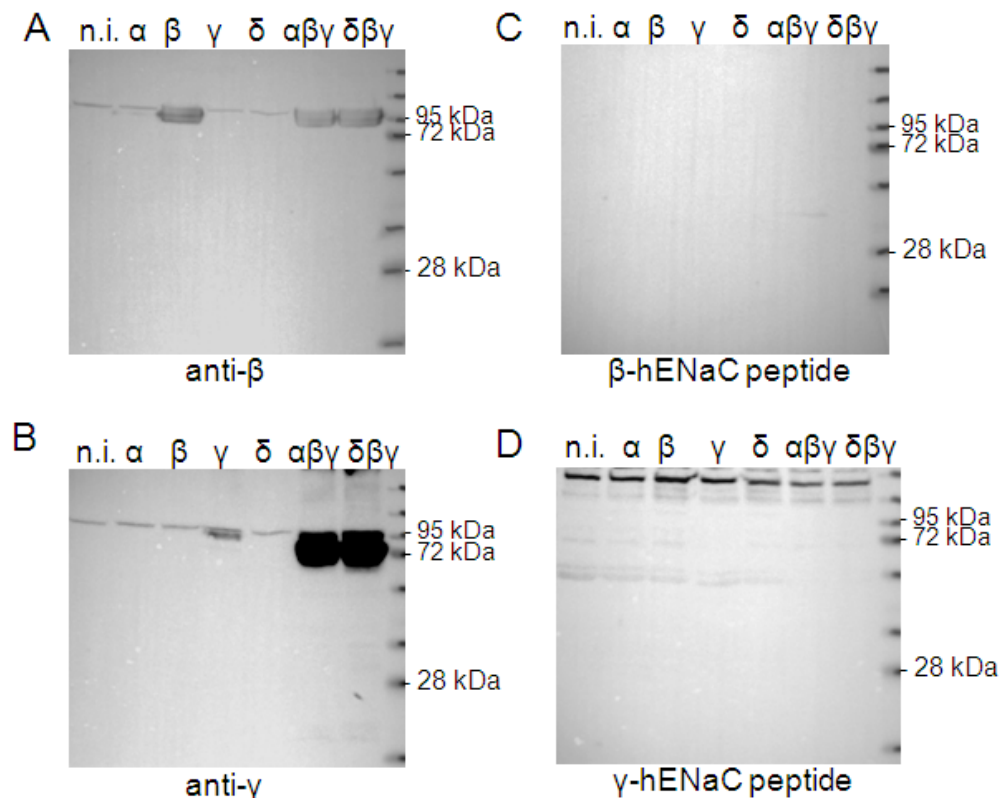

**Figure legend:**

To test the newly generated antibodies against  $\beta$ - (A) or  $\gamma$ -hENaC (B) by western blot analysis we used membrane-enriched fractions from whole-cell lysates of oocytes expressing an individual hENaC subunit ( $\alpha$ ,  $\beta$ ,  $\gamma$ , or  $\delta$ ) or a combination of three subunits ( $\alpha\beta\gamma$ -hENaC or  $\delta\beta\gamma$ -hENaC). A, The  $\beta$ -hENaC antibody detected a specific band of expected size (~95 kDa) in material from oocytes expressing  $\beta$ -

hENaC (lane 3) or all three subunits ( $\alpha\beta\gamma$  in lane 6;  $\delta\beta\gamma$  in lane 7). In contrast, no specific band was detected in non injected oocytes (lane 1) or in oocytes expressing  $\alpha$ -,  $\gamma$ -, or  $\delta$ -hENaC alone (lanes 2, 4, and 5). *B*, Similarly, a specific signal for  $\gamma$ -hENaC was seen in oocytes expressing the  $\gamma$ -subunit alone (lane 4) or in combination with  $\alpha\beta$ -hENaC (lane 6) or  $\delta\beta$ -hENaC (lane 7). *C-D*, As expected, pre-incubating the antibodies with the corresponding immunizing peptides largely prevented the detection of specific bands by the  $\beta$ -hENaC antibody (*C*) and the  $\gamma$ -hENaC antibody (*D*) in western blots. Antibodies were used in a dilution of 1:5,000 either with or without pre-incubation of the antibodies with the immunizing peptide (1:100) for one hour at 4 °C.

### Evaluation of single channel $P_o$ of $\delta\beta\gamma$ -hENaC

| Number of apparent channels in the patch ( $N$ ) | Number of patches | $NP_o$          | $P_o$ |
|--------------------------------------------------|-------------------|-----------------|-------|
| 1                                                | 5                 | $0.89 \pm 0.04$ | 0.89  |
| 2                                                | 1                 | 1.77            | 0.89  |
| 3                                                | 2                 | $2.84 \pm 0.15$ | 0.95  |
| 4                                                | 1                 | 3.70            | 0.93  |
| 5                                                | 1                 | 4.54            | 0.91  |

**Table 1:**  $P_o$  was estimated in outside-out patches of oocytes expressing  $\delta\beta\gamma$ -hENaC by dividing  $NP_o$  by the number of apparent channels ( $N$ ) in the patch.  $NP_o$  was derived from amplitude histograms;  $N$  was determined by visual inspection of the recordings. Average  $NP_o$  values ( $\pm$ SEM) are given for groups of patches containing the same number of apparent channels.
